# Supplementary material for: Genetic architecture of pollination syndrome transition between hummingbird-specialist and generalist species in the genus Rhytidophyllum (Gesneriaceae)
Source: PeerJ. 2015 Jun 18;3:e1028. doi: 10.7717/peerj.1028 (PMC4476130; doi:10.7717/peerj.1028)
Supplement: Table S1 — H, hummingbird specialist; G, generalist; (+1) correspond to parental individuals of the hybrid population but were not used to do the PCA. [file peerj-03-1028-s003.xls]

## Sheet: Feuil3
species	nb of individuals	pollination type
G. acaulis	3	H
G. citrina	2	H
G. cuneifolia	12	H
G. pedicellaris	6	H
G. pulverulenta	2	H
G. reticulata	3	H
G. ventricosa	4	H
G. viridiflora	9	G
R. auriculatum	5 (+1)	G
R. berteroanum	3	H
R. bicolor	2	G
R. crenulatum	4	G
R. exsertum	11	G
R. grandiflorum	3	G
R. leucomallon	1	G
R. rupincola	5 (+1)	H
R. tomentosum	3	G
R. vernicosum	1	G
